# Supplementary material for: Synthesis and characterization of graphene and functionalized graphene via chemical and thermal treatment methods
Source: Royal Society of Chemistry journal article supplement (doi:10.1039/c5ra19954a), 2015-12-22
Supplement: c5ra19954a1.pdf [file c5ra19954a1.pdf]

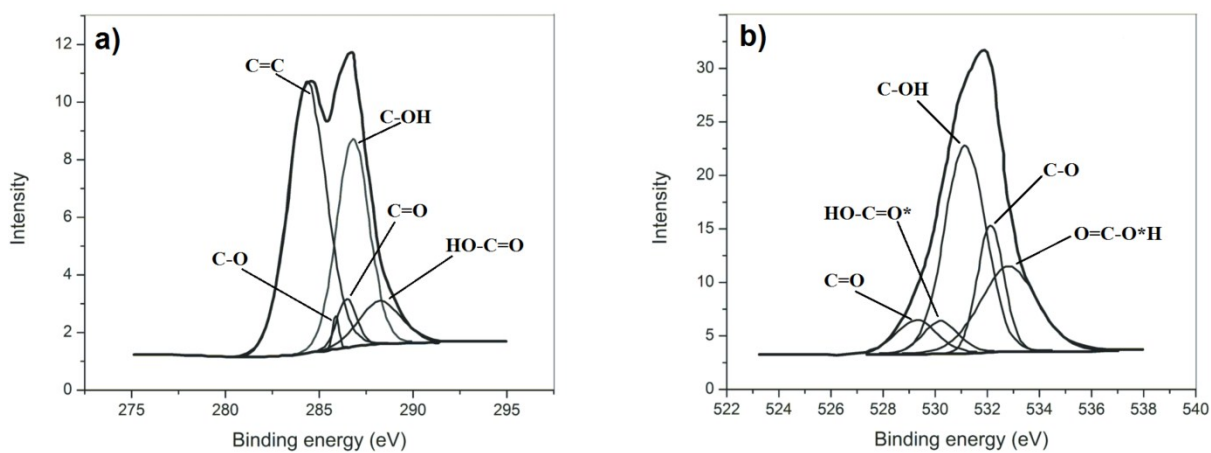

**Fig. S.1:** Deconvoluted XPS spectrum of GO sample; **a)** C (1s) and **b)** O (1s)

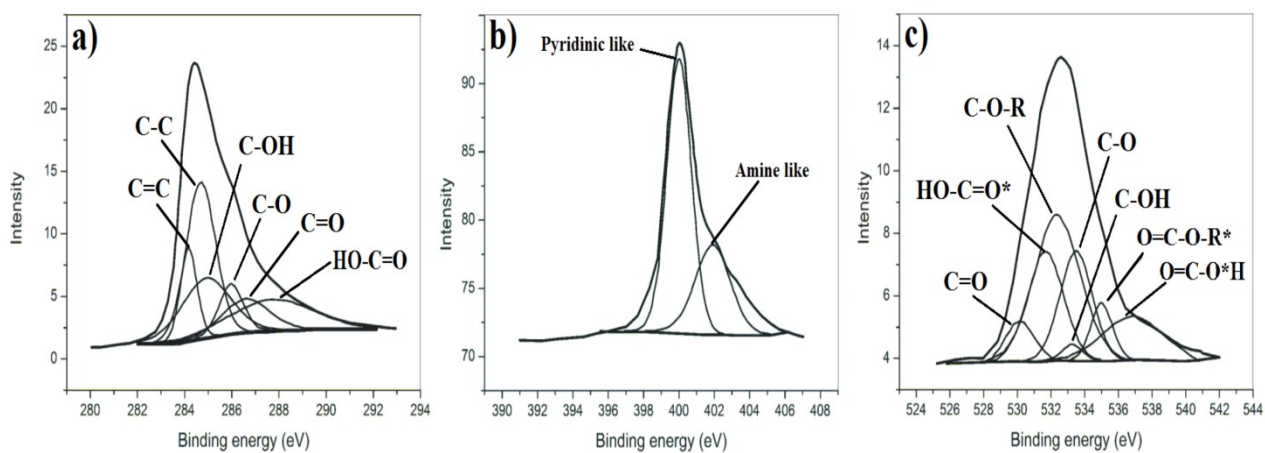

**Fig. S.2:** Deconvoluted XPS spectrum of FGO sample; **a)** C(1s), **b)** N(1s) and **c)** O(1s)

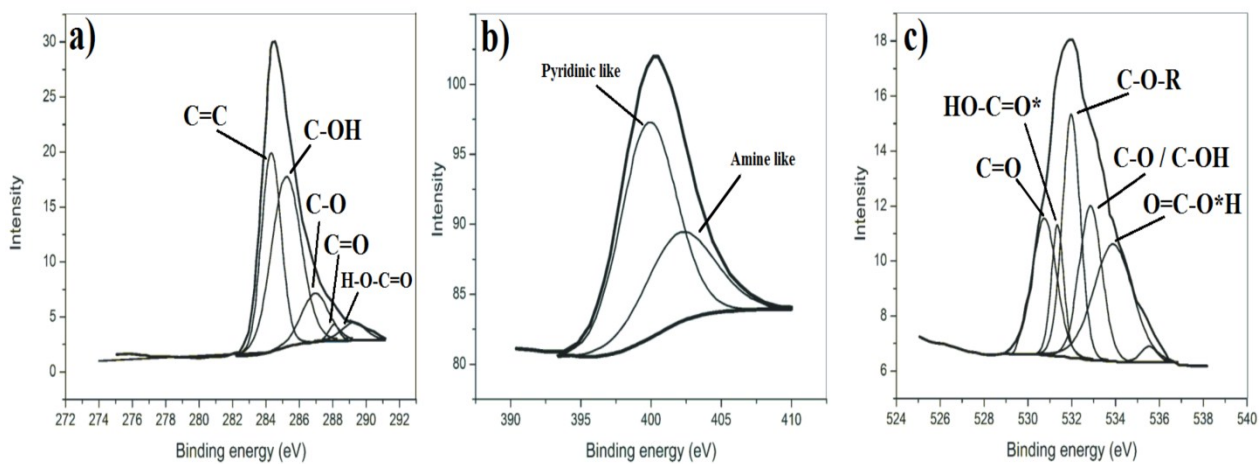

**Fig. S.3:** Deconvoluted XPS spectrum of RFGO sample; **a)** C(1s), **b)** N(1s) and **c)** O(1s)

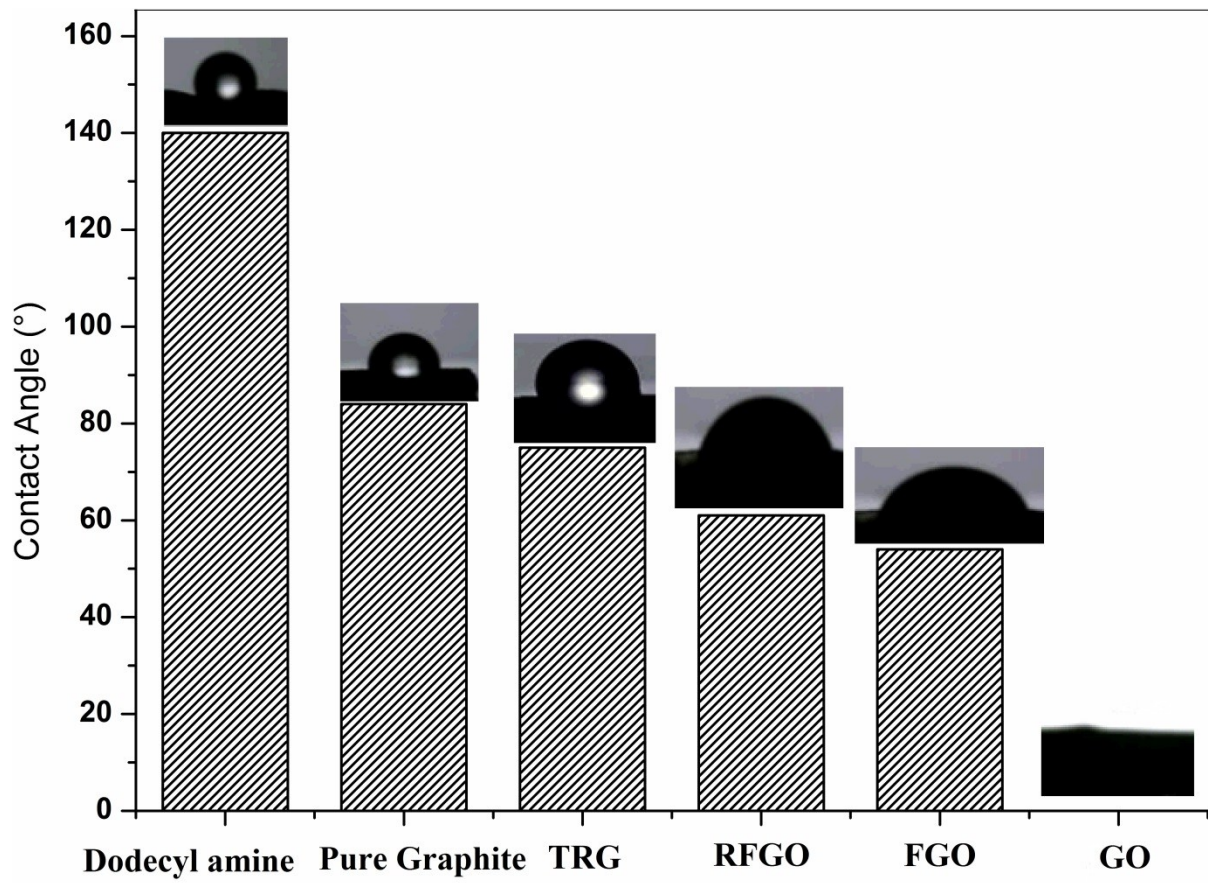

Fig. S.4: Contact angle measurements of all samples
